# Supplementary material for: Exploiting the Nucleic Acid Nature of Aptamers for Signal Amplification
Source: MDPI journal article supplement (doi:10.3390/bios12110972), 2022-11-04
Supplement: s1 [file s1]

## Supplementary Materials

# Exploiting the Nucleic Acid Nature of Aptamers for Signal Amplification

Miriam Jauset-Rubio <sup>1,\*</sup>, Mayreli Ortiz <sup>1</sup> and Ciara K. O'Sullivan <sup>1,2,\*</sup>

<sup>1</sup> INTERFIBIO Consolidated Research Group, Department of Chemical Engineering, Universitat Rovira I Virgili, 43007 Tarragona, Spain

<sup>2</sup> Institució Catalana de Recerca I Estudis Avançats (ICREA), Passeig Lluís Companys 23, 08010 Barcelona, Spain

\* Correspondence: miriam.jauset@urv.cat (M.J.-R.); [ciara.osullivan@urv.cat](mailto:ciara.osullivan@urv.cat) (C.K.O.)

## Table of Contents

**Table S1.** Sequences used in this work. .... 3

**Figure S1.** Cyclic voltammetry performed before and after the surface functionalisation: (a) Carbon screen-printed electrodes; (b) Gold screen-printed electrodes. Cyclic voltammograms were recorded in 1 mM  $K_3[Fe(CN)_6]$  and 100 mM KCl at 100 mV/s. .... 3

**Figure S2.** Binding studies by Surface Plasmon Resonance (SPR): (a) Calculation of the dissociation constant ( $K_D$ ) of the unmodified aptamer; (b) Calculation of the dissociation constant ( $K_D$ ) of the modified biotinylated dUTPs aptamer. The aptamers were prepared in binding buffer (10 mM Phosphate buffer, 135 mM NaCl, 2.5 mM KCl, 1.5 mM  $MgCl_2$  pH 7.4) ranging from 125 nM to 0 nM using 1 in 2 dilutions. The binding affinity of the aptamers was determined by BIAevaluation software using a 1:1 Langmuir binding model. The signal of the specific flow cell (with immobilised  $\beta$ -conglutinin) was corrected by the subtraction of the signal from the control flow cell (activated with EDC/NHS and blocked with ethanolamine, but without  $\beta$ -conglutinin immobilisation). The signals were also corrected via subtraction of the buffer signal obtained..... 4

**Figure S3.**  $\beta$ -conglutinin coating optimisation. Different concentrations of immobilised  $\beta$ -conglutinin ( $80 - 0 \mu g mL^{-1}$ ) in 50 mM carbonate-bicarbonate buffer pH 9.6 were incubated with a constant amount of biotinylated aptamer (1 nM) prepared in binding buffer (10 mM Phosphate buffer, 135 mM NaCl, 2.5 mM KCl, 1.5 mM  $MgCl_2$  pH 7.4) followed by the addition of SA-polyHRP (dil. 1 in 20000 of  $1 mg mL^{-1}$ ). The absorbances were read at 450 nm after the wells being stopped with 1 M  $H_2SO_4$  5 min later of the TMB addition.5

**Figure S4.** Optimal amount of modified aptamer. Different concentrations of aptamer ( $50 - 0 nM$ ) were added to the wells of a microtitre plate modified with  $20 \mu g mL^{-1}$  of  $\beta$ -conglutinin (biotinylated dUTPs aptamer). The supernatant containing any unbound

aptamer was removed and added to a fresh plate, also modified with 20  $\mu\text{g mL}^{-1}$  of  $\beta$ -conglutin (biotinylated dUTPs aptamer supernatant). By comparing both binding curves, 0.4 nM aptamer was demonstrated to be optimal amount of aptamer to use in the competition assay..... 5

**Figure S5.** Evaluation of functionalised carbon screen-printed electrodes using fast chronoamperometry: (a) Signal obtained using fast chronoamperometry from 0 to 0.5 s; (b) Bar graph plotting the signal obtained at 0.5 s. All the aptamers (biotinylated dUTPs aptamer or non cognate aptamer with biotinylated dUTPs) were prepared in binding buffer with a final concentration of 0.4 nM. As controls were used: no coating (without the immobilisation of the target on the surface of the electrode), buffer instead of the aptamer, a cognate aptamer, and three different non cognate targets.**Error! Bookmark not defined.**

**Figure S6.** Evaluation of functionalised gold screen-printed electrodes using fast chronoamperometry: (a) Signal obtained using fast chronoamperometry from 0 to 0.5 s; (b) Bar graph plotting the signal obtained at 0.5 s. All the aptamers (biotinylated dUTPs aptamer or non cognate aptamer with biotinylated dUTPs) were prepared in binding buffer with a final concentration of 0.4 nM. As controls were used: no coating (without the immobilisation of the target on the surface of the electrode), buffer instead of the aptamer, a cognate aptamer, and three different non cognate targets.**Error! Bookmark not defined.**

**Table S1.** Sequences used in this work.

| Name                                    | Sequence                                                                                                        |
|-----------------------------------------|-----------------------------------------------------------------------------------------------------------------|
| Forward primer                          | 5'-AGCTCCAGAAGATAAATTACAGG-3'                                                                                   |
| Reverse phosphorylated primer           | 5'-PO-GGGGTCATAGTATCCTAGTTG-3'                                                                                  |
| Aptamer ( $\beta$ -CBA II)              | 5'-<br>AGCTCCAGAAGATAAATTACAGGGGCCGGGGTGGCTCAGGCAAGGGGTTGACCTGTC<br>GTAGGGATTGTTTAACTAGGATACTATGACCCC-3'        |
| Biotinylated aptamer ( $\beta$ -CBA II) | 5'-Biotin-<br>AGCTCCAGAAGATAAATTACAGGGGCCGGGGTGGCTCAGGCAAGGGGTTGACCTGTC<br>GTAGGGATTGTTTAACTAGGATACTATGACCCC-3' |
| Non cognate aptamer (Seq. 5)            | 5'-<br>AGCTCCAGAAGATAAATTACAGGTCACGCTCCGCGTACGGTGGGCCGGCGAGGGAAT<br>AGCGGCGCGCGAAAATCACTAGGATACTATGACCCC-3'     |

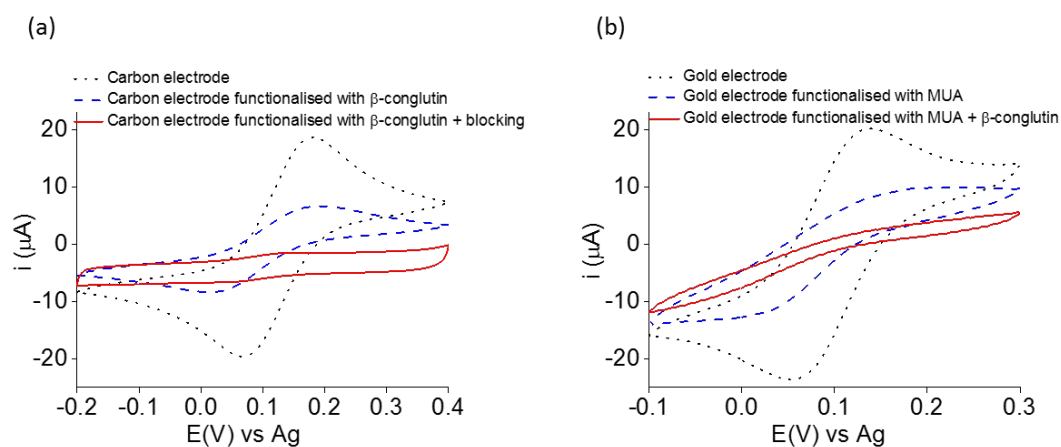

**Figure S1.** Cyclic voltammetry performed before and after the surface functionalisation: (a) Carbon screen-printed electrodes; (b) Gold screen-printed electrodes. Cyclic voltammograms were recorded in 1 mM  $K_3[Fe(CN)_6]$  and 100 mM KCl at 100 mV/s.

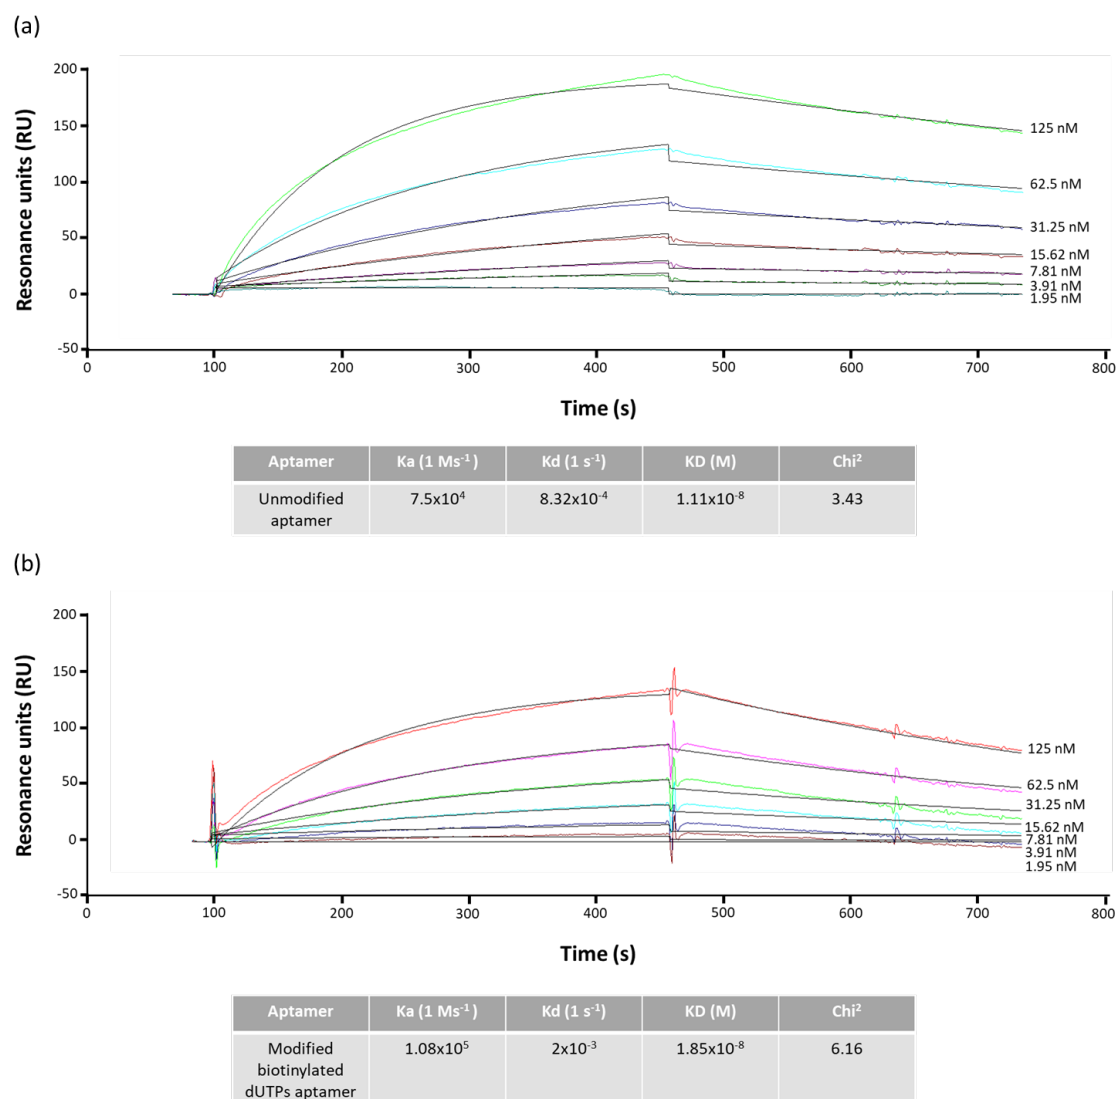

**Figure S2.** Binding studies by Surface Plasmon Resonance (SPR): (a) Calculation of the dissociation constant ( $K_D$ ) of the unmodified aptamer; (b) Calculation of the dissociation constant ( $K_D$ ) of the modified biotinylated dUTPs aptamer. The aptamers were prepared in binding buffer (10 mM Phosphate buffer, 135 mM NaCl, 2.5 mM KCl, 1.5 mM  $\text{MgCl}_2$  pH 7.4) ranging from 125 nM to 0 nM using 1 in 2 dilutions. The binding affinity of the aptamers was determined by BIAevaluation software using a 1:1 Langmuir binding model. The signal of the specific flow cell (with immobilised  $\beta$ -conglutin) was corrected by the subtraction of the signal from the control flow cell (activated with EDC/NHS and blocked with ethanolamine, but without  $\beta$ -conglutin immobilisation). The signals were also corrected via subtraction of the buffer signal obtained.

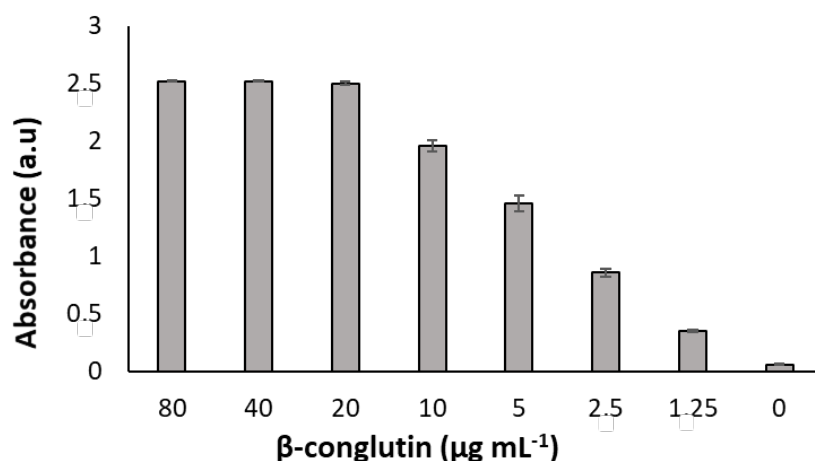

**Figure S3.**  $\beta$ -conglutinin coating optimisation. Different concentrations of immobilised  $\beta$ -conglutinin (80 – 0  $\mu\text{g mL}^{-1}$ ) in 50 mM carbonate-bicarbonate buffer pH 9.6 were incubated with a constant amount of biotinylated aptamer (1 nM) prepared in binding buffer (10 mM Phosphate buffer, 135 mM NaCl, 2.5 mM KCl, 1.5 mM  $\text{MgCl}_2$  pH 7.4) followed by the addition of SA-polyHRP (dil. 1 in 20000 of 1  $\text{mg mL}^{-1}$ ). The absorbances were read at 450 nm after the wells being stopped with 1 M  $\text{H}_2\text{SO}_4$  5 min following addition of TMB.

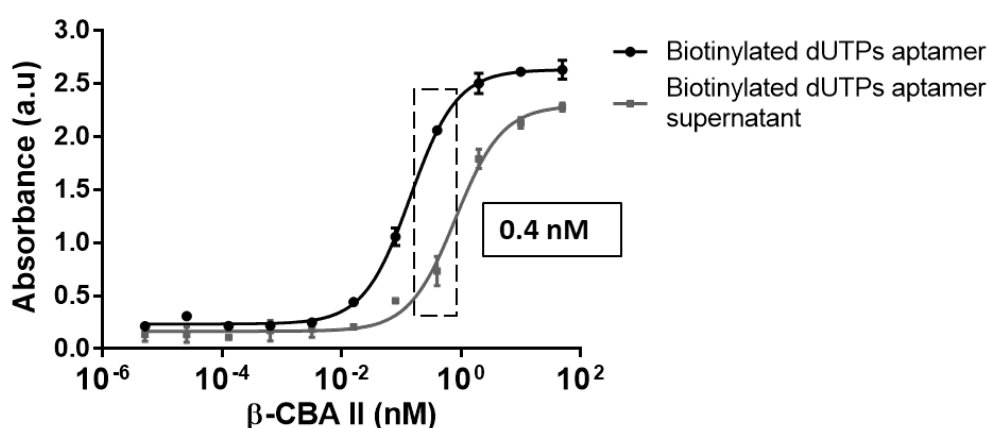

**Figure S4.** Optimal amount of modified aptamer. Different concentrations of aptamer (50 – 0 nM) were added to the wells of a microtitre plate modified with 20  $\mu\text{g mL}^{-1}$  of  $\beta$ -conglutinin (biotinylated dUTPs aptamer). The supernatant containing any unbound aptamer was removed and added to a fresh plate, also modified with 20  $\mu\text{g mL}^{-1}$  of  $\beta$ -conglutinin (biotinylated dUTPs aptamer supernatant). By comparing both binding curves, 0.4 nM aptamer was demonstrated to be optimal.

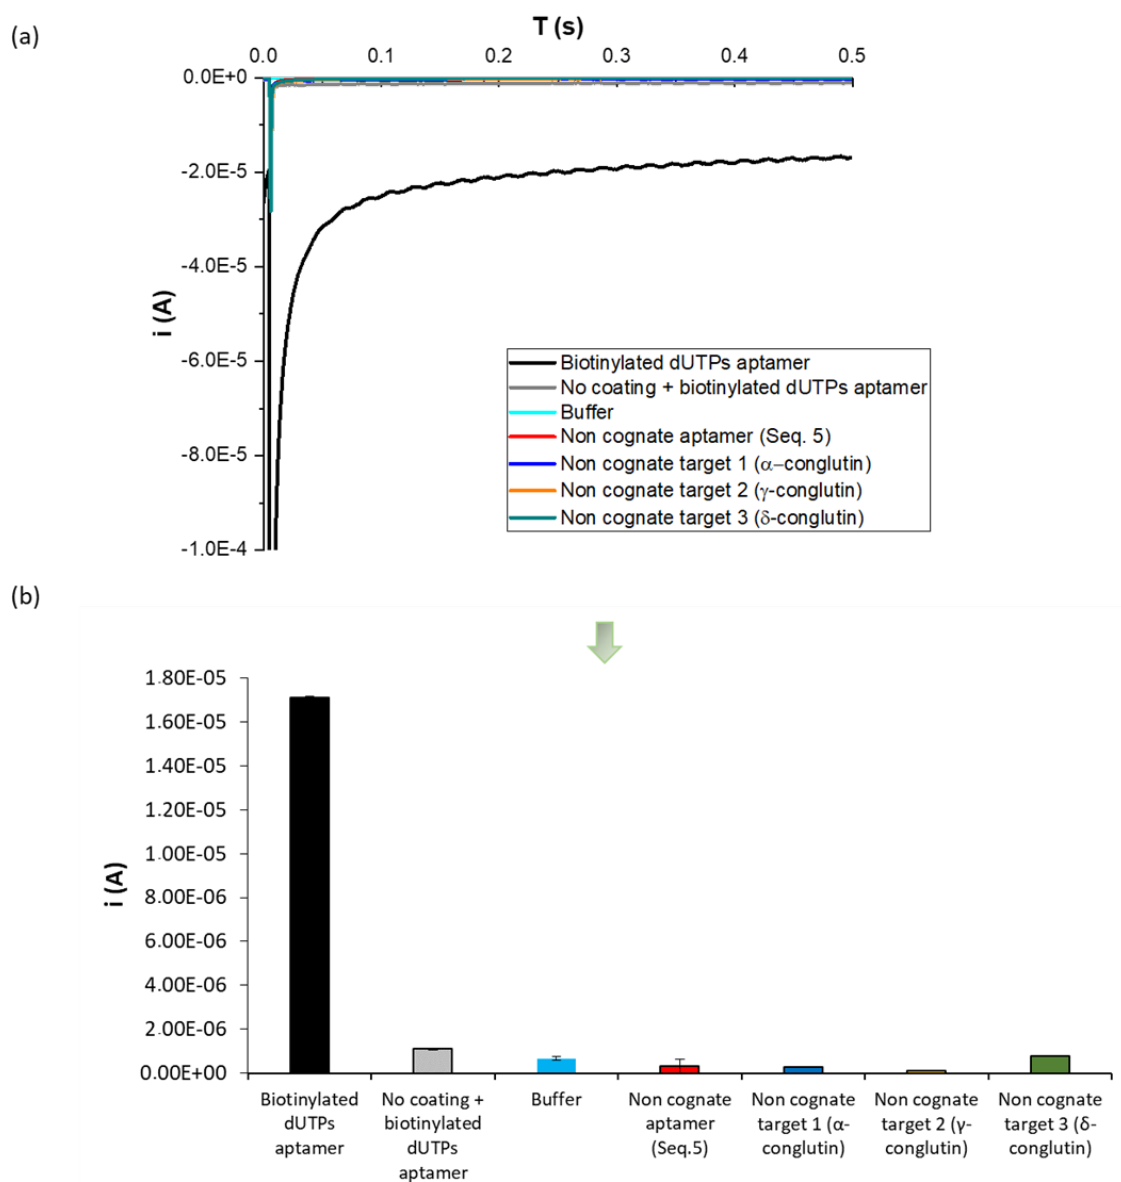

**Figure S5.** Evaluation of functionalised carbon screen-printed electrodes using fast chronoamperometry: (a) Signal obtained using fast chronoamperometry from 0 to 0.5 s; (b) Signal obtained at 0.5 s. All the aptamers (biotinylated dUTPs aptamer or non-cognate aptamer with biotinylated dUTPs) were prepared in binding buffer with a final concentration of 0.4 nM. Controls included: no coating (i.e. bare electrode), buffer instead of the aptamer, a non-cognate aptamer, and three non-cognate targets.

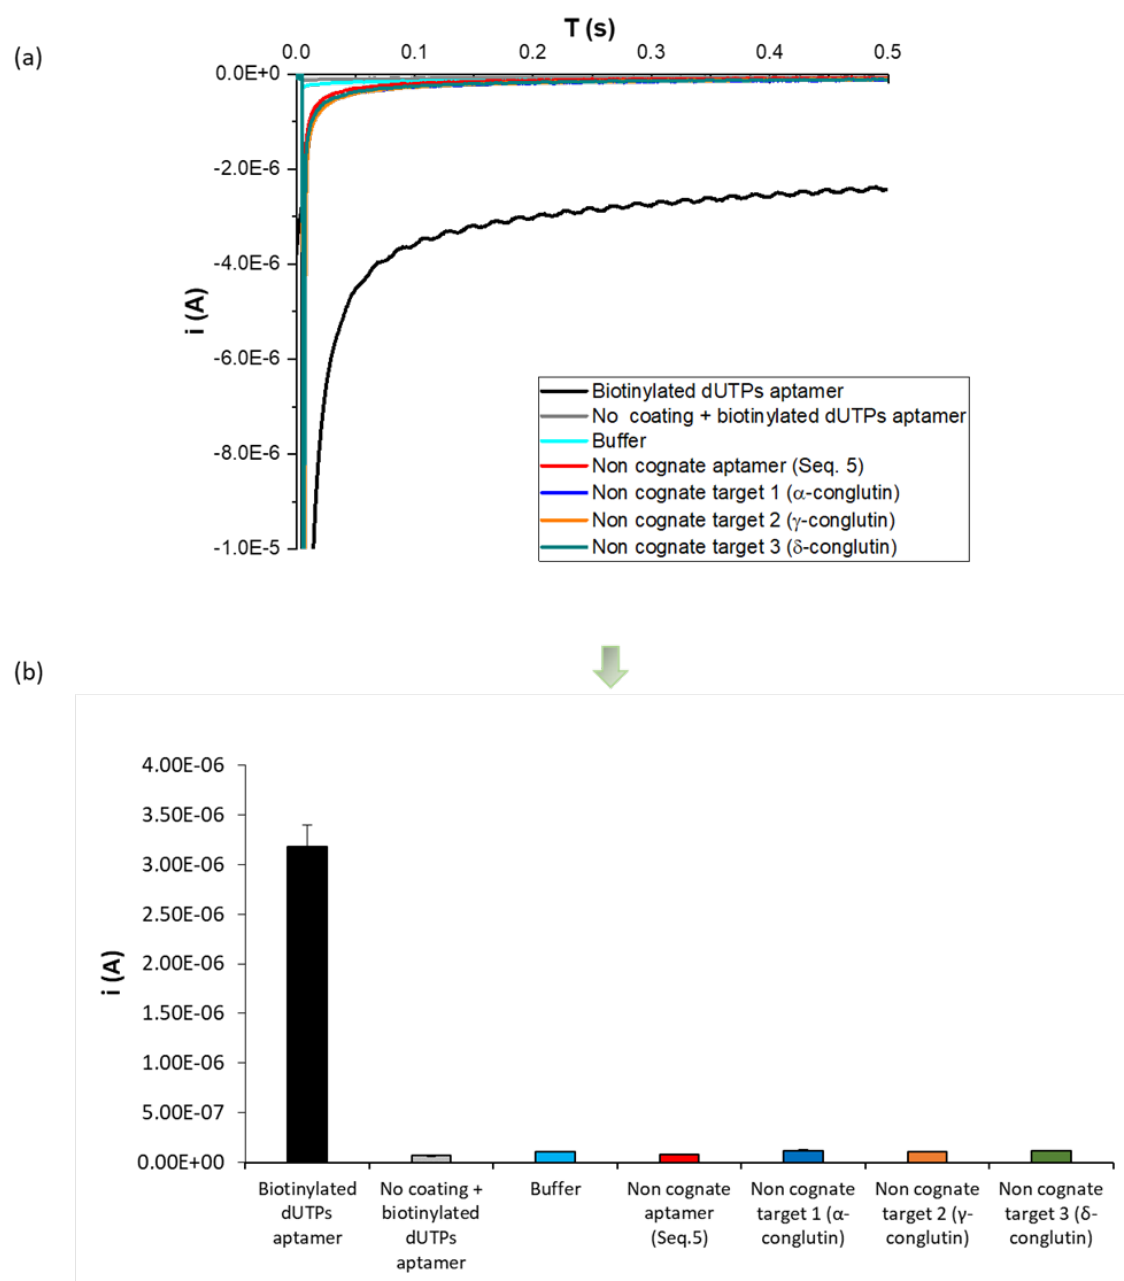

**Figure S6.** Evaluation of functionalised gold screen-printed electrodes using fast chronoamperometry: (a) Signal obtained using fast chronoamperometry from 0 to 0.5 s; (b) Signal obtained at 0.5 s. All the aptamers (biotinylated dUTPs aptamer or non-cognate aptamer with biotinylated dUTPs) were prepared in binding buffer with a final concentration of 0.4 nM. Controls included: no coating (i.e. bare electrode), buffer instead of the aptamer, a non-cognate aptamer, and three different non cognate targets.
